# Supplementary material for: A compounding strategy to boost the transduction coefficient in KNN-based piezoelectric composite ceramics for ultrasonic energy harvesting
Source: Royal Society of Chemistry journal article supplement (doi:10.1039/d2ta09005h), 2022-12-12
Supplement: d2ta09005h1.pdf [file d2ta09005h1.pdf]

*Electronic supplementary information (ESI)*

**A compounding strategy to boost transduction coefficient in  
KNN-based piezoelectric composite ceramics for ultrasonic  
energy harvesting**

Qian Wang, Ruichen Li, Haoyue Xue, Xi-xi Sun, Laiming Jiang\* and Jiagang Wu\*

College of Materials Science and Engineering, Sichuan University, Chengdu 610064, China.

\* Corresponding authors. E-mail: laimingjiang@scu.edu.cn (L. Jiang), msewujg@scu.edu.cn  
(J. Wu)

**This supporting file includes:**

1. Supporting Figures
2. Supporting Tables
3. Supporting References

## 1. Supporting Figures

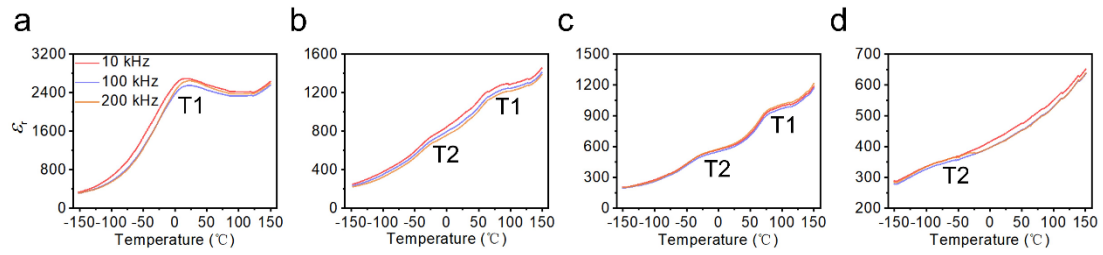

**Fig. S1** Temperature-dependent of  $\epsilon_r$  curves of KNNS-BAZH- $x$ KNN-Fe ceramics measured at -150-150 °C with different frequency. (a)  $x = 0$ . (b)  $x = 0.4$ . (c)  $x = 0.5$ . (d)  $x = 1$ . T1:  $T_{R-O-T}$  of KNNS-BAZH; T2:  $T_{R-O}$  of KNN-Fe.

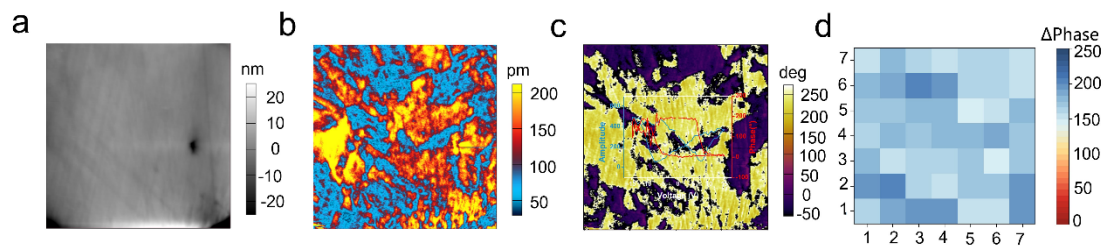

**Fig. S2 Domain structural characterizations of the ceramic with  $x = 0.5$  measured by PFM. (a) Topography (b) Amplitude (c) Phase. (d) Phase contrast mappings of the PFM hysteresis loops collected at  $7 \times 7$  grid positions of KNN barriers.**

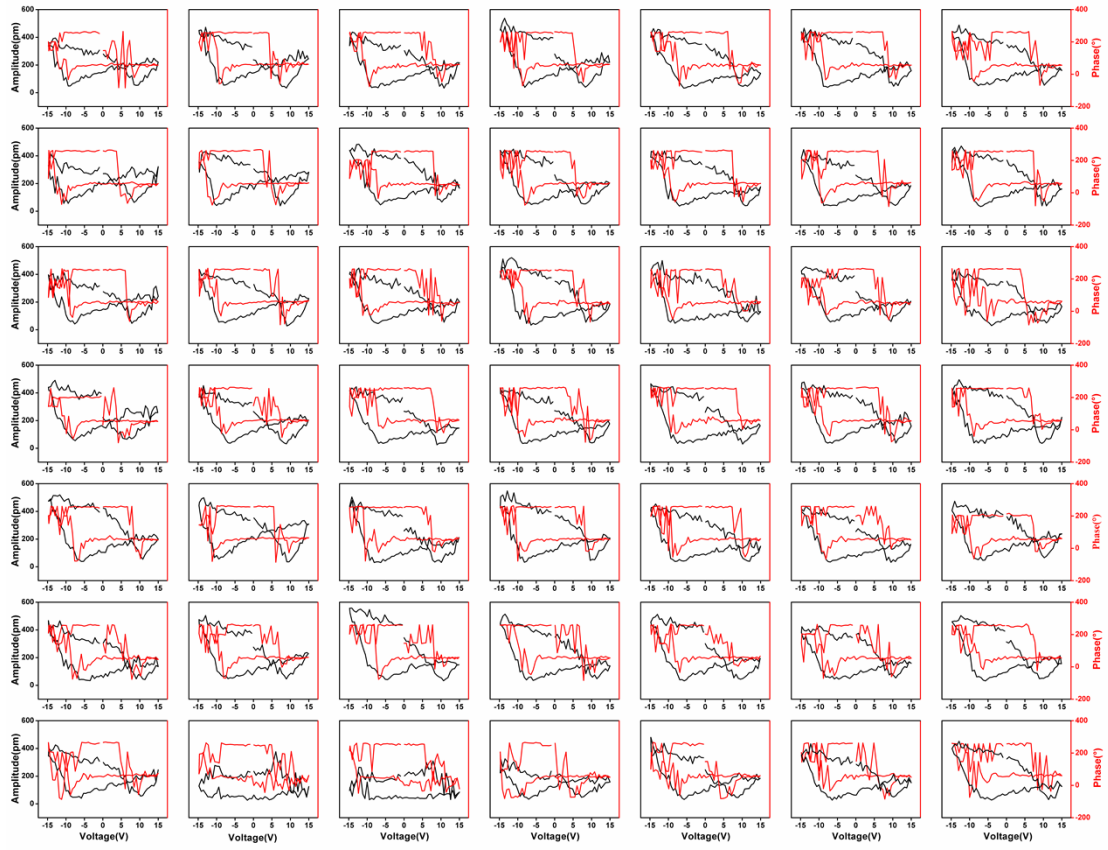

**Fig. S3 Typical SS-PFM loops.** Amplitude and phase measured at different points with  $x = 0$ .

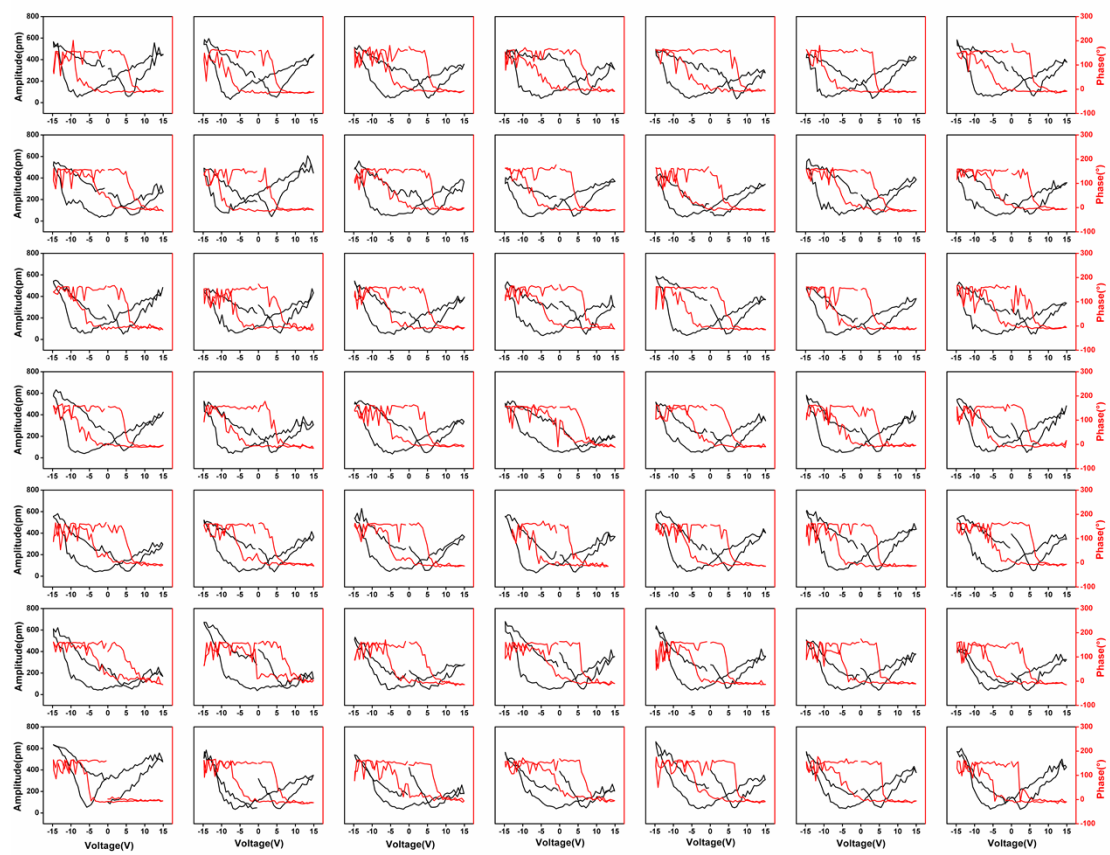

**Fig. S4 Typical SS-PFM loops.** Amplitude and phase measured at different points with  $x = 0.4$ .

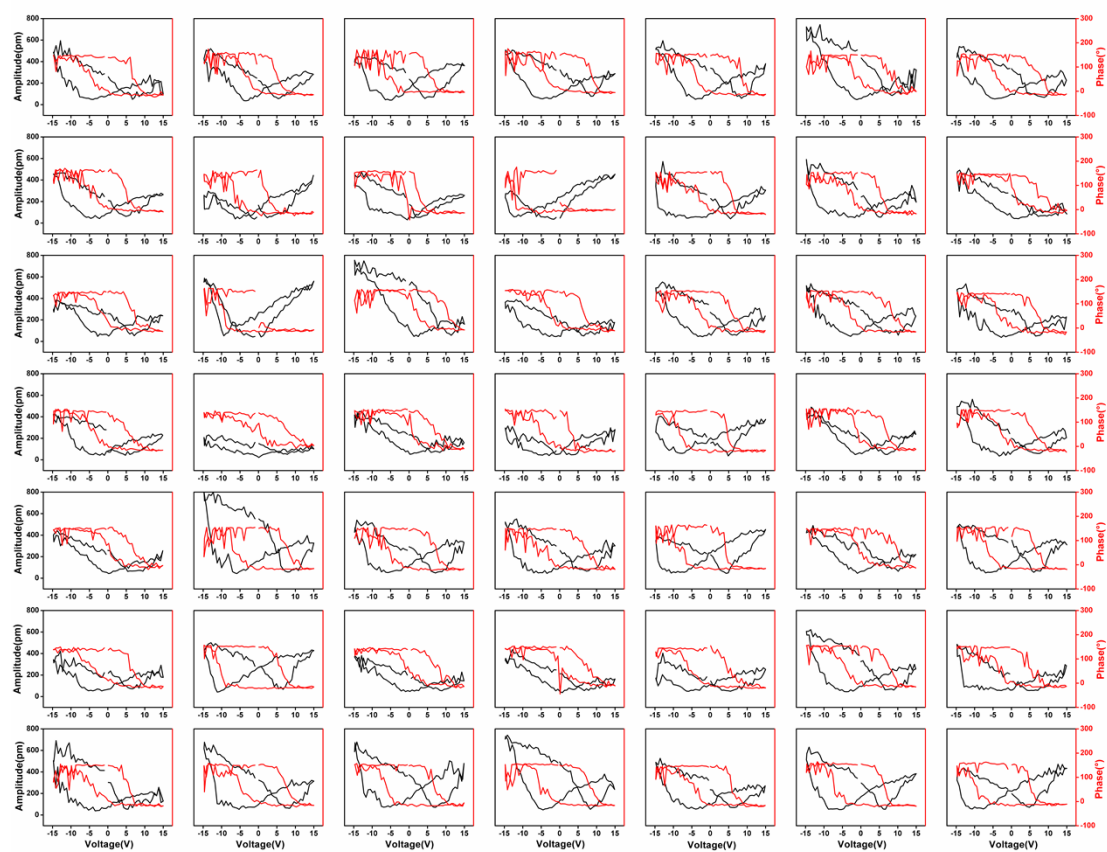

**Fig. S5 Typical SS-PFM loops.** Amplitude and phase measured at different points with  $x = 1$ .

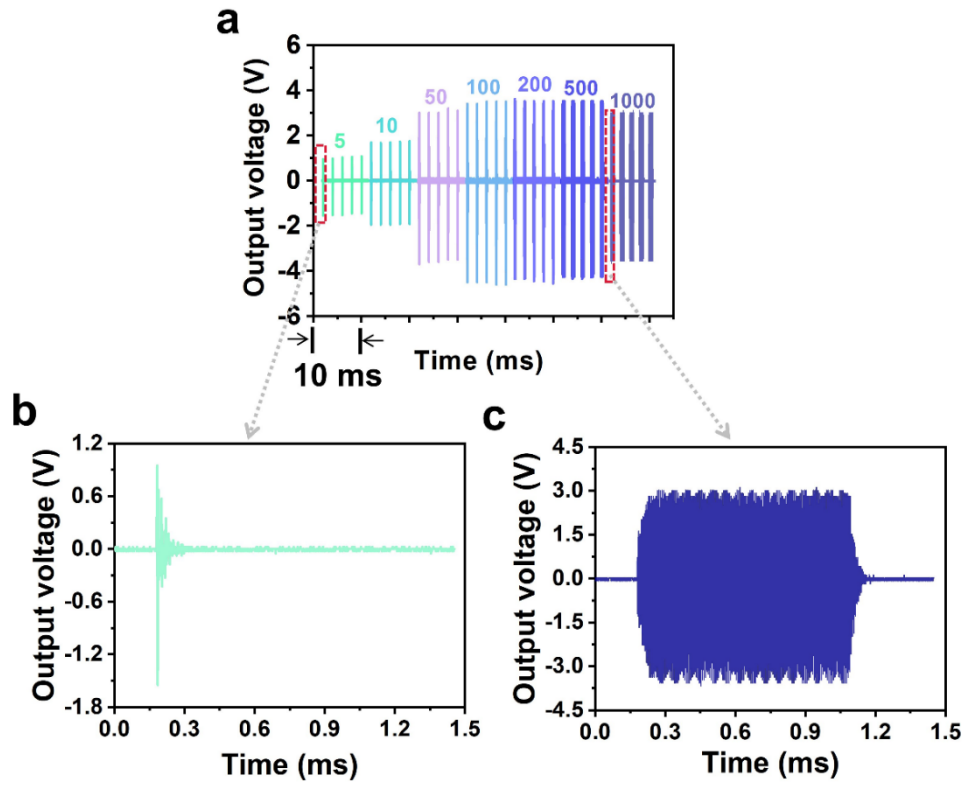

**Fig. S6 Characterizations of the output voltage.** a Output voltage signal of the PUEH measured at different cycles. Ultrasound-induced energy transmission can be regulated by setting trigger cycles. b and c output voltage of part of the 5 cycles and 1000 cycles respectively.

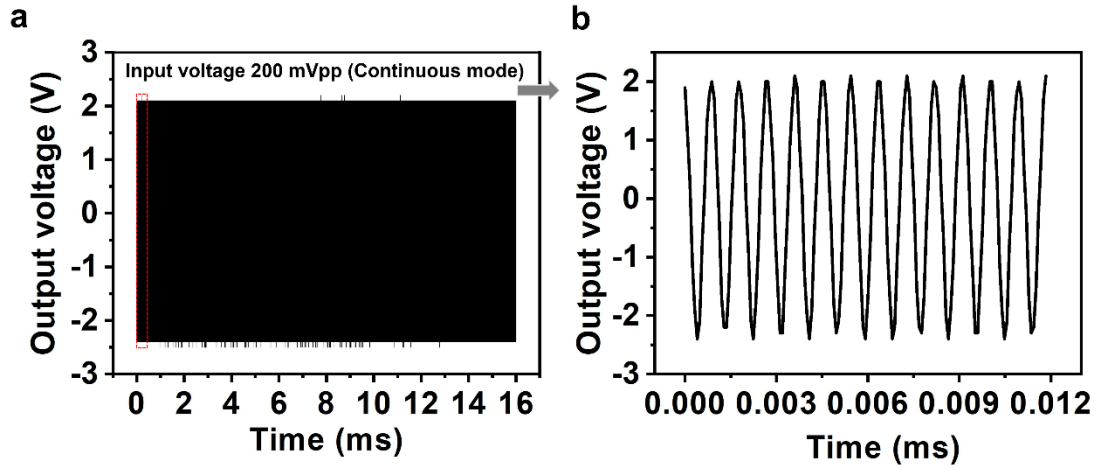

**Fig. S7 Output voltage in a continuous mode.** (a) and (b) Characterizations of the output voltage of the PUEH when the input voltage is 200 mVpp in a continuous mode. A continuous 200 mVpp 200 kHz sinusoidal signal was switched to drive the ultrasonic transmitter, generating a continuous sinusoidal signal, indicating the output signals are purely induced by the piezoelectric effect of the PUEH device.<sup>1</sup>



## 2. Supporting Tables

**Table S1. The average charging power of the ultrasonic energy harvesters to charge the capacitors.**

| Name of devices | Materials                                         | Charging power (nW) | Ref.      |
|-----------------|---------------------------------------------------|---------------------|-----------|
| KNNS-BFC-UEH    | 1–3 type KNN-based piezocomposite                 | 42                  | 2         |
| Piezo-helix     | KNN composite-based lead-free piezoelectric helix | 103                 | 3         |
| LF-PUEH         | KNNS-based 1-3 composite                          | 160.38              | 4         |
| 3D-twining UEH  | KNN-based 1–3 piezo-composites                    | 307                 | 5         |
| Flexible PUEH   | PZT/epoxy 1–3 piezoelectric composites            | 40                  | 1         |
| KNN-based PUEH  | KNN-based composites                              | 737                 | This work |

### 3. Supporting References

1. L. Jiang, Y. Yang, R. Chen, G. Lu, R. Li, D. Li, M. S. Humayun, K. K. Shung, J. Zhu, Y. Chen and Q. Zhou, *Nano Energy*, 2019, **56**, 216-224.
2. J. Xing, H. Chen, L. Jiang, C. Zhao, Z. Tan, Y. Huang, B. Wu, Q. Chen, D. Xiao and J. Zhu, *Nano Energy*, 2021, **84**, 105900.
3. L. M. Jiang, H. Y. Xue, R. C. Li and J. G. Wu, *Applied Physics Letters*, 2022, **120**, 233504.
4. L. Jiang, Y. Yang, R. Chen, G. Lu, R. Li, J. Xing, K. K. Shung, M. S. Humayun, J. Zhu, Y. Chen and Q. Zhou, *Advanced Functional Materials*, 2019, **29**, 1902522.
5. L. Jiang, G. Lu, Y. Yang, Y. Zeng, Y. Sun, R. Li, M. S. Humayun, Y. Chen and Q. Zhou, *Energy & Environmental Science*, 2021, **14**, 1490-1505.
